# Supplementary material for: High-performance carbon-based solid acid prepared by environmental and efficient recycling of PVC waste for cellulose hydrolysis
Source: Royal Society of Chemistry journal article supplement (doi:10.1039/c6ra13358d), 2016-01-01
Supplement: c6ra13358d1.pdf [file c6ra13358d1.pdf]

## Supporting information

### High-performance carbon-based solid acid prepared by environmental and efficient recycling of PVC waste for cellulose hydrolysis†

Tianjin Li<sup>a</sup>, Shuguang Shen<sup>a\*</sup>, Bei Cai, Yuemei Wang, Xin Peng and Yehui Li

### Figures

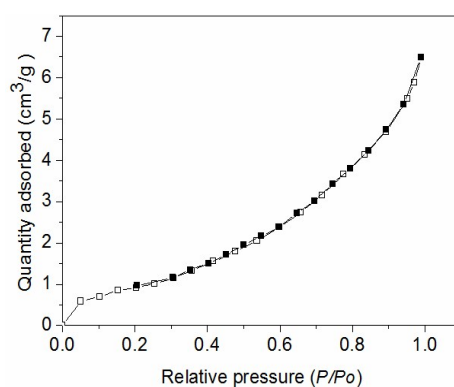

Fig. S1 Nitrogen adsorption-desorption isotherm of PCSA-773-6

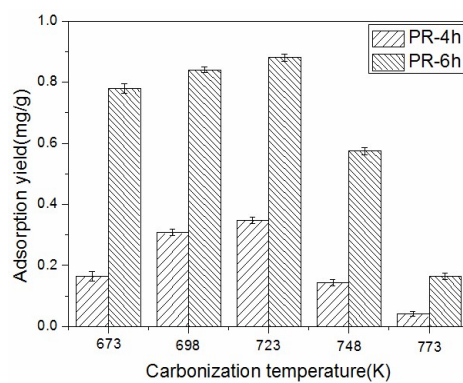

Fig. S2 The effect of carbonization temperature and time on the adsorption of PRs
